# Supplementary material for: Coumarin 7 functionalized europium-based metal–organic-framework luminescent composites for dual-mode optical thermometry
Source: Royal Society of Chemistry journal article supplement (doi:10.1039/d0tc03365k), 2020-01-01
Supplement: d0tc03365k1.pdf [file d0tc03365k1.pdf]

## Electronic Supplementary Information

### Coumarin 7 functionalized europium-based metal-organic-framework luminescent composites for dual-mode optical thermometry

Jiaqiang Liu, Xizhuang Yue, Zhuopeng Wang, Xia Zhang, Yan Xu\*

\*Department of Chemistry, College of Science, Northeastern University, Shenyang, Liaoning 110819, PR China. E-mail: xuyanju@126.com (Y. Xu); Fax: +86-024-83684533; Tel.: +86-024-83684533.

**Table S1** Elemental analysis of C, H, and N, and the real contents of dye molecules loaded in different Dye@Eu-BTC samples.

| Luminescent materials        | C (wt %) | H (wt %) | N (wt %) | Dye (wt %) |
|------------------------------|----------|----------|----------|------------|
| Dye <sub>0.005</sub> @Eu-BTC | 25.54    | 3.38     | 0.63     | 5.00       |
| Dye <sub>0.001</sub> @Eu-BTC | 31.99    | 3.79     | 2.24     | 17.76      |
| Dye <sub>0.01</sub> @Eu-BTC  | 38.42    | 4.21     | 3.94     | 31.24      |

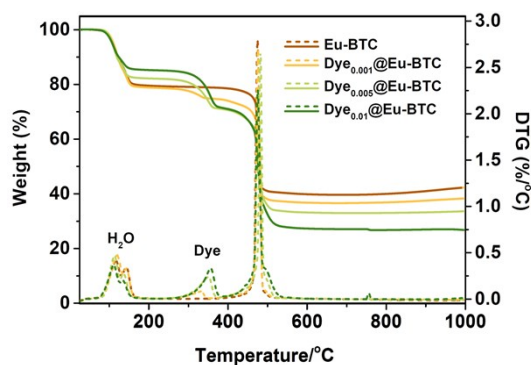

**Fig. S1** TG curves of the Eu-BTC, Dye<sub>0.005</sub>@Eu-BTC, Dye<sub>0.001</sub>@Eu-BTC, and Dye<sub>0.01</sub>@Eu-BTC samples.

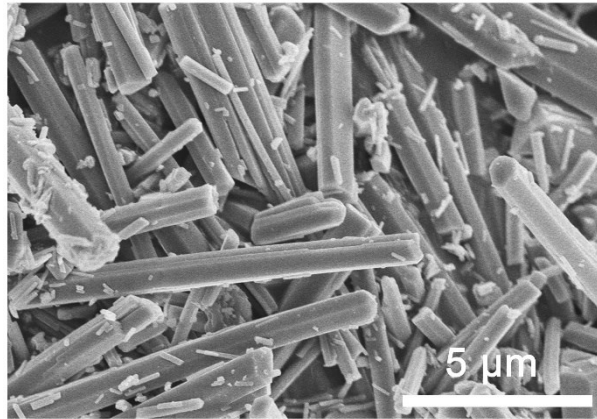

**Fig. S2** The SEM image of Dye0.005@Eu-BTC after 10 cycles of heating and cooling processes.
